# Supplementary material for: Enhancing Command and Control (C2) Assessment through Semantic Systems
Source: Springer Nature journal article supplement (doi:10.1186/1750-1326-1-12), 2011-06-01

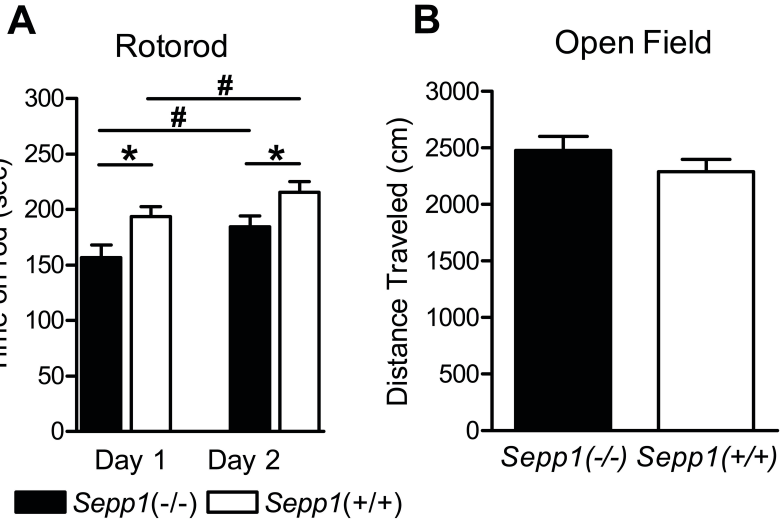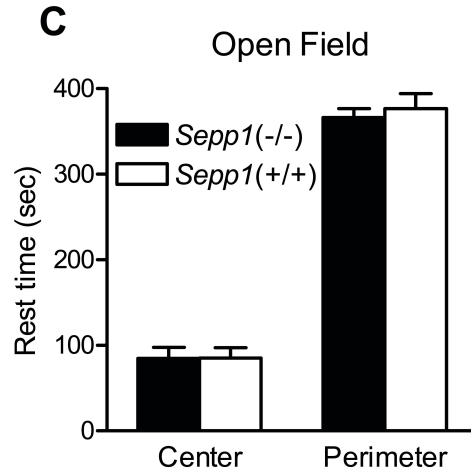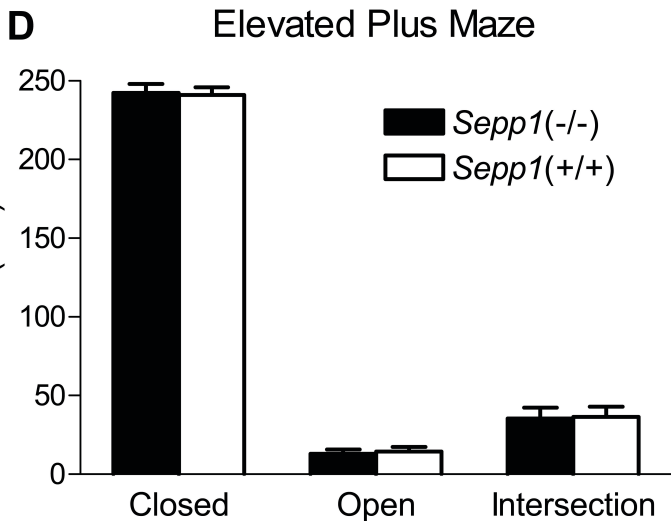

Supplement: 13024_2006_12_MOESM2_ESM.pdf [file 13024_2006_12_MOESM2_ESM.pdf]
