# Supplementary material for: Enhancing Command and Control (C2) Assessment through Semantic Systems
Source: Springer Nature journal article supplement (doi:10.1186/1750-1326-1-12), 2011-06-01
Supplement: 13024_2006_12_MOESM7_ESM.pdf [file 13024_2006_12_MOESM7_ESM.pdf]

Table 1                      Selenium Levels

| <u>Genotype, Diet</u>         | <u>Selenium in brain (ng/g)</u> |
|-------------------------------|---------------------------------|
| <i>Sepp +/+</i> , 0mg Se/kg   | 99 ± 27                         |
| <i>Sepp (-/-)</i> , 0mg Se/kg | 86 ± 12                         |
| <i>Sepp +/+</i> , 1mg Se/kg   | 134 ± 9                         |
| <i>Sepp (-/-)</i> , 1mg Se/kg | 91 ± 20                         |

Adapted from *Hill et al 2003*
